# Supplementary material
Source: publisher figshare collection journal article supplement (https://sage.figshare.com/ndownloader/files/22366224)
Supplement: Supplementary file 1 [file 22366224]

**Supplementary online table 1: List of studies found on initial search after removing duplicates and reviews**

1. Clinical characteristics of fatal and recovered cases of coronavirus 2019 (COVID-19) in Wuhan, China: a retrospective study – Yan Deng et al
2. Dysregulation of immune response in patients with COVID-19 in Wuhan, China – Chuan Qin et al
3. Risk factors associated with acute respiratory distress syndrome and death in patients with coronavirus 2019 pneumonia in Wuhan, China – Chaomin Wu et al
4. Clinical characteristics of coronavirus disease 2019 in China - W Guan et al
5. Clinical features of patients infected with 2019 novel coronavirus in Wuhan, China – Chaolin Huang et al
6. Clinical and biochemical indexes from 2019-nCov infected patients linked to viral loads and lung injury- Yingxia Liu et al
7. Clinical predictors of mortality due to COVID-19 based on analysis of data of 150 patients from Wuhan, China – Qiurong Ruan et al
8. Association of cardiac injury with mortality in hospitalized patients with COVID-19 in Wuhan, China – Shaobo Shi et al
9. Clinical features and treatment of COVID-19 patients in Northeast Chongqing – Suxin Wan et al
10. Clinical features of 69 cases with coronavirus disease 2019 in Wuhan, China – Zhongliang Wang et al

11. Clinical characteristics of 138 hospitalized patients with 2019 novel coronavirus-infected pneumonia in Wuhan, China- Dawel Wang et al
12. Clinical course and outcomes of critically ill patients with SARS-CoV-2 pneumonia in Wuhan, China: a single-centered, retrospective, observational study – Xiaobo Yang et al
13. Clinical characteristics of 140 patients infected with SARS-CoV-2 in Wuhan, China – Jin-Jin Zhang et al
14. Clinical course and risk factors for mortality of adult inpatients with COVID-19 in Wuhan, China: a retrospective cohort study – Fei Zhou et al
15. Clinical characteristics of 113 deceased patients with coronavirus disease 2019: retrospective study – Tao Chen et al
16. Clinical and immunologic features in severe and moderate coronavirus disease 2019 – Guang Chen et al
17. Epidemiologic and clinical characteristics of 91 hospitalized patients with COVID-19 in Zhejiang, China: A retrospective, multi-center case series – Guo-Qing Qian et al
18. Platelet-to-lymphocyte ratio is associated with prognosis in patients with corona virus disease -19 – Rong Qu et al
19. Hematologic parameters in patients with COVID-19 infection – Bingwen Eugene Fan et al
20. Diagnostic utility of clinical laboratory data determinations for patients with severe COVID-19 – Yong Gao et al
21. Analysis of clinical characteristics and laboratory findings of 95 cases of 2019 novel coronavirus pneumonia in Wuhan, China: a retrospective analysis – Gemin Zhang et al
